# Supplementary material for: Eating Timing and Frequency as a Predictor of Hospitalization and/or Mortality From Coronary Artery Disease: The Linked CCHS-DAD-CMDB 2004-2013 Study
Source: PubMed Central journal article supplement — CJC Open. 2022 Apr 14;4(7):625–35. doi: 10.1016/j.cjco.2022.03.011 (PMC9294983; doi:10.1016/j.cjco.2022.03.011), 2022-04-14
Supplement: mmc1.pdf [file mmc1.pdf]

## SUPPLEMENTARY MATERIAL

**Supplemental Table S1.** Breakfast and between-meal consumption and multivariable-adjusted hazard ratios of hospitalization and/or mortality from coronary artery disease (CAD)<sup>a</sup> with 95% confidence intervals (CI)

|                                                    | Breakfast                |                         | P-value      |
|----------------------------------------------------|--------------------------|-------------------------|--------------|
|                                                    | No                       | Yes                     |              |
| Adjusted for age and sex: HR (95% CI)              | 1.12 (0.81-1.55)         | 1.00 (Referent)         | 0.489        |
| + Demographic factors <sup>b</sup>                 | 1.10 (0.79-1.52)         | 1.00 (Referent)         | 0.582        |
| + Lifestyle and mental health factors <sup>c</sup> | 0.98 (0.71-1.36)         | 1.00 (Referent)         | 0.918        |
| + <b>Dietary factors<sup>d</sup></b>               | <b>0.98 (0.70-1.36)</b>  | <b>1.00 (Referent)</b>  | <b>0.886</b> |
| Additional adjustment for potential mediators      |                          |                         |              |
| + Health conditions <sup>e</sup>                   | 0.98 (0.71-1.37)         | 1.00 (Referent)         | 0.922        |
| + BMI <sup>f</sup>                                 | 0.98 (0.71-1.37)         | 1.00 (Referent)         | 0.926        |
|                                                    | Between-Meal Consumption |                         | P-value      |
|                                                    | No                       | Yes                     |              |
| Adjusted for age and sex: HR (95% CI)              | 1.00 (Referent)          | 1.12 (0.90-1.40)        | 0.326        |
| + Demographic factors <sup>b</sup>                 | 1.00 (Referent)          | 1.12 (0.90-1.40)        | 0.310        |
| + Lifestyle and mental health factors <sup>c</sup> | 1.00 (Referent)          | 1.09 (0.87-1.36)        | 0.453        |
| + <b>Dietary factors<sup>d</sup></b>               | <b>1.00 (Referent)</b>   | <b>1.08 (0.83-1.40)</b> | <b>0.570</b> |
| Additional adjustment for potential mediators      |                          |                         |              |
| + Health conditions <sup>e</sup>                   | 1.00 (Referent)          | 1.08 (0.83-1.39)        | 0.581        |
| + BMI <sup>f</sup>                                 | 1.00 (Referent)          | 1.07 (0.83-1.39)        | 0.609        |

BMI, Body Mass Index; CAD, coronary heart disease; CI, confidence interval; HR, hazard ratio

<sup>a</sup> The definition of hospitalization and/or mortality from CAD included angina (ICD-10-CA code I20).

<sup>b</sup> In addition to age (years) and sex (male, female), this model is adjusted for baseline demographic factors: largest ethnic group (yes, no), marital status (married, not married), education ( $\leq$ secondary school graduation,  $>$ secondary school graduation, missing), immigrant (yes, no, missing), food secure (yes, no, missing), and household income ( $<$ \$15,000, \$15,000-\$29,999, \$30,000-\$49,999, \$50,000-\$79,999,  $\geq$ \$80,000, missing).

<sup>c</sup> In addition to age, sex, and baseline demographic factors, this model is further adjusted for baseline lifestyle and mental health factors: smoking (never, past, current, missing), alcohol intake (none-  $<$ 3 times/mo, 1-3 times/wk, 4+ times/wk, missing), physical activity index (active, moderately active, inactive, missing), and life stress (not at all stressful, not very stressful, a bit stressful, quite a bit or extremely stressful, missing).

<sup>d</sup> In addition to age, sex, baseline demographic, lifestyle, and mental health factors, this model is further adjusted for baseline dietary factors: consumption of sugar sweetened beverages (yes, no), fruit and vegetable intake (times/day), eating frequency (times/day), sodium (mg/day), sugar (g/day), and energy intake (kcal/day). This is the main model reported for this analysis.

<sup>e</sup> In addition to age, sex and baseline demographic, lifestyle, mental health, and dietary factors, this model is further adjusted for baseline health conditions: high blood pressure (yes, no, missing) and diabetes (yes, no, missing).

<sup>f</sup> In addition to age, sex, baseline demographic, lifestyle, mental health, and dietary factors, and baseline health conditions, this model is further adjusted for baseline BMI ( $\text{kg}/\text{m}^2$ , <18.5, 18.5-24.9, 25-29.9,  $\geq 30$ ).

**Supplemental Table S2.** Eating frequency and multivariable-adjusted hazard ratios of hospitalization and/or mortality from coronary artery disease (CAD)<sup>a</sup> with 95% confidence intervals (CI)

|                                                    | Eating Frequency       |                         |              |                         |              |
|----------------------------------------------------|------------------------|-------------------------|--------------|-------------------------|--------------|
|                                                    | ≤3 times/day           | 4-5 times/day           | P-value      | ≥6 times/day            | P-value      |
| Adjusted for age and sex: HR (95% CI)              | 1.00 (Referent)        | 1.05 (0.86-1.26)        | 0.652        | 1.02 (0.82-1.27)        | 0.878        |
| + Demographic factors <sup>b</sup>                 | 1.00 (Referent)        | 1.05 (0.87-1.27)        | 0.643        | 1.05 (0.84-1.31)        | 0.673        |
| + Lifestyle and mental health factors <sup>c</sup> | 1.00 (Referent)        | 1.06 (0.87-1.28)        | 0.576        | 1.03 (0.82-1.28)        | 0.827        |
| + <b>Dietary factors<sup>d</sup></b>               | <b>1.00 (Referent)</b> | <b>0.95 (0.72-1.26)</b> | <b>0.741</b> | <b>0.82 (0.49-1.36)</b> | <b>0.437</b> |
| Additional adjustment for potential mediators      |                        |                         |              |                         |              |
| + Health conditions <sup>e</sup>                   | 1.00 (Referent)        | 0.92 (0.70-1.22)        | 0.581        | 0.77 (0.46-1.29)        | 0.318        |
| + BMI <sup>f</sup>                                 | 1.00 (Referent)        | 0.92 (0.70-1.22)        | 0.563        | 0.76 (0.45-1.27)        | 0.297        |

BMI, Body Mass Index; CAD, coronary heart disease; CI, confidence interval; HR, hazard ratio

<sup>a</sup> The definition of hospitalization and/or mortality from CAD included angina (ICD-10-CA code I20).

<sup>b</sup> In addition to age (years) and sex (male, female), this model is adjusted for baseline demographic factors: largest ethnic group (yes, no), marital status (married, not married), education (≤secondary school graduation, >secondary school graduation, missing), immigrant (yes, no, missing), food secure (yes, no, missing), and household income (<\$15,000, \$15,000-\$29,999, \$30,000-\$49,999, \$50,000-\$79,999, ≥\$80,000, missing).

<sup>c</sup> In addition to age, sex, and baseline demographic factors, this model is further adjusted for baseline lifestyle and mental health factors: smoking (never, past, current, missing), alcohol intake (none- <3 times/mo, 1-3 times/wk, 4+ times/wk, missing), physical activity index (active, moderately active, inactive, missing), and life stress (not at all stressful, not very stressful, a bit stressful, quite a bit or extremely stressful, missing).

<sup>d</sup> In addition to age, sex, baseline demographic, lifestyle, and mental health factors, this model is further adjusted for baseline dietary factors: consumption of sugar sweetened beverages (yes, no), fruit and vegetable intake (times/day), sodium (mg/day), sugar (g/day), energy intake (kcal/day), and breakfast consumption (yes, no). This is the main model reported for this analysis.

<sup>e</sup> In addition to age, sex and baseline demographic, lifestyle, mental health, and dietary factors, this model is further adjusted for baseline health conditions: high blood pressure (yes, no, missing) and diabetes (yes, no, missing).

<sup>f</sup> In addition to age, sex, baseline demographic, lifestyle, mental health, and dietary factors, and baseline health conditions, this model is further adjusted for baseline BMI (kg/m<sup>2</sup>, <18.5, 18.5-24.9, 25-29.9, ≥30).
